# Supplementary material for: Increased QT Dispersion Is Linked to Worse Outcomes in Patients Hospitalized for Out‐of‐Hospital Cardiac Arrest
Source: PubMed Central journal article supplement — J Am Heart Assoc. 2020 Aug 8;9(16):e016485. doi: 10.1161/JAHA.120.016485 (PMC7660793; doi:10.1161/jaha.120.016485), 2020-08-08
Supplement: JAH3-9-e016485-s001.pdf [file JAH3-9-e016485-s001.pdf]

# **SUPPLEMENTAL MATERIAL**

**Table S1. Sensitivity analysis for the QT dispersion cutpoint and survival at discharge.**

| <b>Cutpoint<br/>(ms)</b> | <b>Sensitivity</b> | <b>Specificity</b> | <b>Correctly<br/>Classified</b> | <b>LR+</b> | <b>LR-</b> |
|--------------------------|--------------------|--------------------|---------------------------------|------------|------------|
| ( >= 52.58.. )           | 100.00%            | 0.00%              | 54.95%                          | 1.0000     | 0.0000     |
| ( >= 54.75.. )           | 100.00%            | 2.44%              | 56.04%                          | 1.0250     | 0.0000     |
| ( >= 56.42.. )           | 100.00%            | 4.88%              | 57.14%                          | 1.0513     | 0.0000     |
| ( >= 57.01.. )           | 100.00%            | 7.32%              | 58.24%                          | 1.0789     | 0.0000     |
| ( >= 59.30.. )           | 100.00%            | 9.76%              | 59.34%                          | 1.1081     | 0.0000     |
| ( >= 62.01.. )           | 100.00%            | 12.20%             | 60.44%                          | 1.1389     | 0.0000     |
| ( >= 69.69.. )           | 100.00%            | 14.63%             | 61.54%                          | 1.1714     | 0.0000     |
| ( >= 76.44.. )           | 100.00%            | 17.07%             | 62.64%                          | 1.2059     | 0.0000     |
| ( >= 77.8378 )           | 100.00%            | 19.51%             | 63.74%                          | 1.2424     | 0.0000     |
| ( >= 77.98.. )           | 100.00%            | 21.95%             | 64.84%                          | 1.2813     | 0.0000     |
| ( >= 82.94.. )           | 100.00%            | 24.39%             | 65.93%                          | 1.3226     | 0.0000     |
| ( >= 83.41.. )           | 100.00%            | 26.83%             | 67.03%                          | 1.3667     | 0.0000     |
| ( >= 83.85.. )           | 100.00%            | 29.27%             | 68.13%                          | 1.4138     | 0.0000     |
| ( >= 85.8671 )           | 100.00%            | 31.71%             | 69.23%                          | 1.4643     | 0.0000     |
| ( >= 85.88.. )           | 100.00%            | 34.15%             | 70.33%                          | 1.5185     | 0.0000     |
| ( >= 87.81.. )           | 100.00%            | 36.59%             | 71.43%                          | 1.5769     | 0.0000     |
| ( >= 89.416 )            | 100.00%            | 39.02%             | 72.53%                          | 1.6400     | 0.0000     |
| ( >= 95.89.. )           | 100.00%            | 41.46%             | 73.63%                          | 1.7083     | 0.0000     |
| ( >= 96.25.. )           | 98.00%             | 41.46%             | 72.53%                          | 1.6742     | 0.0482     |
| ( >= 101 )               | 98.00%             | 43.90%             | 73.63%                          | 1.7470     | 0.0456     |
| ( >= 101.236 )           | 98.00%             | 46.34%             | 74.73%                          | 1.8264     | 0.0432     |
| ( >= 102.2.. )           | 98.00%             | 48.78%             | 75.82%                          | 1.9133     | 0.0410     |
| ( >= 104.3.. )           | 96.00%             | 48.78%             | 74.73%                          | 1.8743     | 0.0820     |
| ( >= 104.7.. )           | 96.00%             | 51.22%             | 75.82%                          | 1.9680     | 0.0781     |
| ( >= 105.0.. )           | 96.00%             | 53.66%             | 76.92%                          | 2.0716     | 0.0745     |

|                |        |        |        |        |        |
|----------------|--------|--------|--------|--------|--------|
| ( >= 106.132 ) | 94.00% | 53.66% | 75.82% | 2.0284 | 0.1118 |
| ( >= 106.1.. ) | 94.00% | 56.10% | 76.92% | 2.1411 | 0.1070 |
| ( >= 106.6.. ) | 92.00% | 56.10% | 75.82% | 2.0956 | 0.1426 |
| ( >= 107.3.. ) | 92.00% | 58.54% | 76.92% | 2.2188 | 0.1367 |
| ( >= 107.9.. ) | 92.00% | 60.98% | 78.02% | 2.3575 | 0.1312 |
| ( >= 109.1.. ) | 90.00% | 60.98% | 76.92% | 2.3063 | 0.1640 |
| ( >= 109.8.. ) | 90.00% | 63.41% | 78.02% | 2.4600 | 0.1577 |
| ( >= 111.345 ) | 90.00% | 65.85% | 79.12% | 2.6357 | 0.1519 |
| ( >= 111.3.. ) | 90.00% | 68.29% | 80.22% | 2.8385 | 0.1464 |
| ( >= 112.2.. ) | 90.00% | 70.73% | 81.32% | 3.0750 | 0.1414 |
| ( >= 112.4.. ) | 90.00% | 73.17% | 82.42% | 3.3545 | 0.1367 |
| ( >= 113.8.. ) | 90.00% | 75.61% | 83.52% | 3.6900 | 0.1323 |
| ( >= 114.5.. ) | 90.00% | 78.05% | 84.62% | 4.1000 | 0.1281 |
| ( >= 117.2.. ) | 88.00% | 78.05% | 83.52% | 4.0089 | 0.1538 |
| ( >= 117.8.. ) | 88.00% | 80.49% | 84.62% | 4.5100 | 0.1491 |
| ( >= 121.1.. ) | 88.00% | 82.93% | 85.71% | 5.1543 | 0.1447 |
| ( >= 121.8.. ) | 86.00% | 82.93% | 84.62% | 5.0371 | 0.1688 |
| ( >= 123.508 ) | 84.00% | 82.93% | 83.52% | 4.9200 | 0.1929 |
| ( >= 124.8.. ) | 82.00% | 82.93% | 82.42% | 4.8029 | 0.2171 |
| ( >= 125.6.. ) | 80.00% | 82.93% | 81.32% | 4.6857 | 0.2412 |
| ( >= 125.8.. ) | 78.00% | 82.93% | 80.22% | 4.5686 | 0.2653 |
| ( >= 126.8.. ) | 76.00% | 82.93% | 79.12% | 4.4514 | 0.2894 |
| ( >= 128.0.. ) | 74.00% | 82.93% | 78.02% | 4.3343 | 0.3135 |
| ( >= 128.6.. ) | 72.00% | 82.93% | 76.92% | 4.2171 | 0.3376 |
| ( >= 130.0.. ) | 70.00% | 82.93% | 75.82% | 4.1000 | 0.3618 |
| ( >= 133.334 ) | 68.00% | 82.93% | 74.73% | 3.9829 | 0.3859 |
| ( >= 134.9.. ) | 68.00% | 85.37% | 75.82% | 4.6467 | 0.3749 |
| ( >= 135.5.. ) | 66.00% | 85.37% | 74.73% | 4.5100 | 0.3983 |
| ( >= 136.3.. ) | 64.00% | 85.37% | 73.63% | 4.3733 | 0.4217 |

|                |        |        |        |         |        |
|----------------|--------|--------|--------|---------|--------|
| ( >= 136.9.. ) | 62.00% | 85.37% | 72.53% | 4.2367  | 0.4451 |
| ( >= 141.4.. ) | 60.00% | 85.37% | 71.43% | 4.1000  | 0.4686 |
| ( >= 143.8.. ) | 58.00% | 85.37% | 70.33% | 3.9633  | 0.4920 |
| ( >= 144.2.. ) | 56.00% | 85.37% | 69.23% | 3.8267  | 0.5154 |
| ( >= 144.4.. ) | 56.00% | 87.80% | 70.33% | 4.5920  | 0.5011 |
| ( >= 147.6.. ) | 54.00% | 87.80% | 69.23% | 4.4280  | 0.5239 |
| ( >= 150.832 ) | 52.00% | 87.80% | 68.13% | 4.2640  | 0.5467 |
| ( >= 150.9.. ) | 50.00% | 87.80% | 67.03% | 4.1000  | 0.5694 |
| ( >= 151.336 ) | 48.00% | 87.80% | 65.93% | 3.9360  | 0.5922 |
| ( >= 151.6.. ) | 46.00% | 87.80% | 64.84% | 3.7720  | 0.6150 |
| ( >= 152.8.. ) | 46.00% | 90.24% | 65.93% | 4.7150  | 0.5984 |
| ( >= 153.393 ) | 44.00% | 90.24% | 64.84% | 4.5100  | 0.6205 |
| ( >= 156.4.. ) | 42.00% | 90.24% | 63.74% | 4.3050  | 0.6427 |
| ( >= 157.3.. ) | 40.00% | 90.24% | 62.64% | 4.1000  | 0.6649 |
| ( >= 158.5.. ) | 40.00% | 92.68% | 63.74% | 5.4667  | 0.6474 |
| ( >= 159.0.. ) | 40.00% | 95.12% | 64.84% | 8.2000  | 0.6308 |
| ( >= 161.5.. ) | 38.00% | 95.12% | 63.74% | 7.7900  | 0.6518 |
| ( >= 169.8.. ) | 36.00% | 95.12% | 62.64% | 7.3800  | 0.6728 |
| ( >= 181.9.. ) | 34.00% | 95.12% | 61.54% | 6.9700  | 0.6938 |
| ( >= 188.3.. ) | 32.00% | 95.12% | 60.44% | 6.5600  | 0.7149 |
| ( >= 197.691 ) | 32.00% | 97.56% | 61.54% | 13.1200 | 0.6970 |
| ( >= 203.0.. ) | 30.00% | 97.56% | 60.44% | 12.3000 | 0.7175 |
| ( >= 204.1.. ) | 28.00% | 97.56% | 59.34% | 11.4800 | 0.7380 |
| ( >= 208.933 ) | 26.00% | 97.56% | 58.24% | 10.6600 | 0.7585 |
| ( >= 210.667 ) | 24.00% | 97.56% | 57.14% | 9.8400  | 0.7790 |
| ( >= 215.0.. ) | 22.00% | 97.56% | 56.04% | 9.0200  | 0.7995 |
| ( >= 216.3.. ) | 20.00% | 97.56% | 54.95% | 8.2000  | 0.8200 |
| ( >= 217.4.. ) | 18.00% | 97.56% | 53.85% | 7.3800  | 0.8405 |
| ( >= 219.1.. ) | 16.00% | 97.56% | 52.75% | 6.5600  | 0.8610 |

|                |        |         |        |        |        |
|----------------|--------|---------|--------|--------|--------|
| ( >= 232.4.. ) | 14.00% | 97.56%  | 51.65% | 5.7400 | 0.8815 |
| ( >= 234.9.. ) | 12.00% | 97.56%  | 50.55% | 4.9200 | 0.9020 |
| ( >= 261.591 ) | 10.00% | 97.56%  | 49.45% | 4.1000 | 0.9225 |
| ( >= 265 )     | 8.00%  | 97.56%  | 48.35% | 3.2800 | 0.9430 |
| ( >= 266.7.. ) | 6.00%  | 97.56%  | 47.25% | 2.4600 | 0.9635 |
| ( >= 269.8.. ) | 4.00%  | 97.56%  | 46.15% | 1.6400 | 0.9840 |
| ( >= 290.1.. ) | 4.00%  | 100.00% | 47.25% | 0.9600 |        |
| ( >= 335.3.. ) | 2.00%  | 100.00% | 46.15% | 0.9800 |        |
| ( > 335.3.. )  | 0.00%  | 100.00% | 45.05% | 1.0000 |        |
